# Supplementary material
Source: MDPI journal article supplement (https://www.mdpi.com/2076-3417/11/13/6039)
Supplement: s1 [file s1]

## Supplementary Material

Table S1 VFCs in aged HBV and SV detected by HS-SPME/GC-MS

| Compounds       |                                               | Concentrations (mg·L <sup>-1</sup> ) |                      |
|-----------------|-----------------------------------------------|--------------------------------------|----------------------|
|                 |                                               | HBV                                  | SV                   |
| <b>Acids</b>    | Propanoic acid, 2-methyl-                     | 51.24±0.17                           | 103.85±2.72          |
|                 | <b>Butanoic acid, 3-methyl-</b>               | <b>563.83±10.40</b>                  | <b>458.56±13.12</b>  |
|                 | Butanoic acid, 2-methyl-                      | 214.71±4.12                          | 164.36±4.50          |
|                 | Pentanoic acid, 4-methyl-                     | 24.42±2.42                           | 25.36±1.67           |
|                 | Pentanoic acid, 3-methyl-                     | 5.15±0.81                            | -                    |
|                 | L-Lactic acid                                 | 72.75±1.94                           | 35.39±2.40           |
|                 | Benzoic acid                                  | 56.29±0.91                           | 98.45±2.44           |
|                 | Tetradecanoic acid                            | 19.14±0.10                           | 33.47±2.45           |
|                 | Dodecanoic acid                               | -                                    | 17.19±1.55           |
|                 | Propanedioic acid                             | -                                    | 20.74±4.06           |
|                 | Heptanoic acid                                | 73.66±1.88                           | 71.62±3.27           |
|                 | Nonanoic acid                                 | 224.44±1.73                          | 114.33±3.06          |
|                 | <b>Hexanoic acid</b>                          | <b>808.51±16.02</b>                  | <b>431.15±10.84</b>  |
| <b>Alcohols</b> | 1-Butanol, 3-methyl-                          | 58.45±2.44                           | 10.66±0.47           |
|                 | 1-Butanol, 2-methyl-                          | 28.21±2.98                           | 5.58±0.41            |
|                 | 1-Pentanol                                    | 2.23±0.16                            | -                    |
|                 | <b>2,3-Butanediol, [R-(R*,R*)]-</b>           | <b>248.85±3.43</b>                   | <b>1043.19±30.54</b> |
|                 | <b>2-Furanmethanol</b>                        | <b>411.11±7.15</b>                   | <b>747.36±10.15</b>  |
|                 | 1-Hexanol                                     | 2.12±0.08                            | -                    |
|                 | 4,5-Octanediol, 2,7-dimethyl-                 | 6.98±0.41                            | 10.11±0.78           |
|                 | 1-Hexanol, 2-ethyl-                           | 10.12±0.08                           | 7.82±0.58            |
|                 | <b>Phenylethyl alcohol</b>                    | <b>1578.52±34.31</b>                 | <b>2478.52±55.52</b> |
|                 | Cedrol                                        | 20.15±2.93                           | 16.23±0.87           |
|                 | Propylene Glycol                              | 13.03±0.73                           | -                    |
|                 | 2-Butanol, 1-methoxy-                         | 12.08±0.76                           | -                    |
|                 | 1-Propanol, 3-(methylthio)-                   | 20.78±1.97                           | -                    |
|                 | 1-Dodecanol                                   | -                                    | 26.97±1.39           |
|                 | 1-Tetradecanol                                | -                                    | 20.21±1.56           |
|                 | n-Tridecan-1-ol                               | 20.25±1.59                           | 20.23±0.87           |
|                 | 1-Decanol                                     | -                                    | 28.31±0.93           |
| <b>Esters</b>   | Isobutyl acetate                              | 3.34±0.24                            | -                    |
|                 | Propanoic acid, 2-hydroxy-, ethyl ester, (S)- | 55.58±1.82                           | 53.38±1.68           |
|                 | 1-Butanol, 3-methyl-, acetate                 | 13.39±1.69                           | -                    |
|                 | 1-Butanol, 2-methyl-, acetate                 | 9.09±0.77                            | -                    |
|                 | 1-Methoxy-2-propyl acetate                    | 323.91±7.71                          | 109.79±4.80          |
|                 | <b>2-Furanmethanol, acetate</b>               | <b>231.23±14.30</b>                  | <b>105.97±4.22</b>   |
|                 | 2,3-Butanediol, diacetate                     | 185.17±110.02                        | 74.59±2.54           |
|                 | 1,3-Propanediol, diacetate                    | 45.37±3.80                           | 51.41±0.99           |
|                 | 3-(Methylthio)propyl acetate                  | 107.03±4.98                          | 24.18±1.54           |
|                 | Acetic acid, phenylmethyl ester               | 30.31±3.05                           | -                    |

|                  |                                                                                   |                      |                    |
|------------------|-----------------------------------------------------------------------------------|----------------------|--------------------|
|                  | Butanedioic acid, diethyl ester                                                   | 148.15±2.93          | 109.06±1.46        |
|                  | Formic acid, 2-phenylethyl ester                                                  | 11.73±1.22           | 11.08±1.47         |
|                  | Benzeneacetic acid, ethyl ester                                                   | 19.33±2.35           | 4.06±0.75          |
|                  | <b>Acetic acid, 2-phenylethyl ester</b>                                           | <b>1193.05±32.56</b> | <b>495.92±7.01</b> |
|                  | l-(+)-Ascorbic acid 2,6-dihexadecanoate                                           | 55.17±1.53           | 112.59±3.95        |
|                  | Dibutyl phthalate                                                                 | 207.09±6.43          | 210.07±7.12        |
|                  | Hexadecanoic acid, ethyl ester                                                    | 34.51±2.48           | 58.77±2.67         |
|                  | Ethyl Acetate                                                                     | 10.12±1.50           | 16.15±1.52         |
|                  | n-Caproic acid vinyl ester                                                        | 19.06±1.46           | 48.12±2.83         |
|                  | Allyl 2-ethyl butyrate                                                            | 10.04±0.74           | -                  |
|                  | Phenol, 4-methoxy-, acetate                                                       | 40.13±2.21           | -                  |
|                  | n-Propyl acetate                                                                  | 0.82±0.16            | -                  |
|                  | Propanoic acid, 2-methyl-, 3-hydroxy-2,4,4-trimethylpentyl ester                  | -                    | 7.12±0.79          |
|                  | 1,2-Benzenedicarboxylic acid, bis(2-methylpropyl) ester                           | -                    | 49.37±2.38         |
|                  | Benzoic acid, 4-hydroxy-3-methoxy-, ethyl ester                                   | -                    | 7.09±0.77          |
|                  | Cyclohexanol, 5-methyl-2-(1-methylethyl)-, acetate, (1.alpha.,2.alpha.,5.alpha.)- | -                    | 3.75±0.32          |
|                  | Butyrolactone                                                                     | -                    | 1.02±0.27          |
| <b>Aldehydes</b> | Hexanal                                                                           | 14.62±0.44           | 28.81±2.69         |
|                  | <b>3-Furaldehyde</b>                                                              | <b>95.88±2.74</b>    | <b>367.65±4.70</b> |
|                  | Methional                                                                         | 3.12±0.79            | 20.21±2.27         |
|                  | <b>Benzaldehyde</b>                                                               | <b>414.71±3.33</b>   | <b>303.41±2.41</b> |
|                  | <b>Benzeneacetaldehyde</b>                                                        | <b>114.65±3.29</b>   | <b>203.71±2.62</b> |
|                  | Nonanal                                                                           | 43.57±1.82           | 55.71±2.63         |
|                  | Decanal                                                                           | 37.76±1.24           | 38.67±2.59         |
|                  | 2-Phenyl-3-(2-furyl)-propenal                                                     | 141.62±2.56          | 245.49±3.88        |
|                  | 5-Methyl-2-phenyl-2-hexenal                                                       | 26.31±0.93           | 10.23±0.87         |
|                  | Benzeneacetaldehyde, .alpha.-ethylidene-                                          | 15.17±0.83           | 19.22±0.86         |
|                  | Heptanal                                                                          | 2.98±0.55            | -                  |
|                  | <b>2-Octenal, (E)-</b>                                                            | <b>208.86±5.56</b>   | <b>-</b>           |
|                  | <b>2-Undecenal</b>                                                                | <b>84.14±0.81</b>    | <b>5.06±0.75</b>   |
|                  | Vanillin                                                                          | -                    | 59.69±1.90         |
|                  | 2-Propenal, 3-(2,6,6-trimethyl-1-cyclohexen-1-yl)-                                | 7.33±0.94            | 6.29±0.91          |
| <b>Furans</b>    | 2-Acetyl-5-methylfuran                                                            | 65.52±0.76           | 31.26±0.63         |
|                  | Furan, 2-butyltetrahydro-                                                         | -                    | 66.23±2.12         |
| <b>Ketones</b>   | Acetoin                                                                           | 4.21±0.15            | 16.98±0.69         |
|                  | <b>2(3H)-Furanone, dihydro-5-pentyl-</b>                                          | <b>174.52±3.20</b>   | <b>306.76±4.78</b> |
|                  | Ethanone, 1-(2-furanyl)-                                                          | 12.78±1.26           | -                  |
|                  | 5-Hepten-2-one, 6-methyl-                                                         | 1.09±0.06            | -                  |
|                  | 1-Propanone, 1-(2-furanyl)-                                                       | 40.41±1.12           | 7.21±0.86          |
|                  | 2,5-Cyclohexadiene-1,4-dione,2,5-dimethyl-                                        | 20.39±0.98           | -                  |
|                  | trans-Furfurylideneacetone                                                        | 21.24±0.88           | 26.28±0.91         |

|                  |                                                              |                    |                      |
|------------------|--------------------------------------------------------------|--------------------|----------------------|
|                  | 2-Undecanone                                                 | 20.22±1.57         | -                    |
|                  | 3,4-dihydroxyphenyl-2-propanone                              | -                  | 19.23±1.58           |
|                  | 2,6,6-Trimethyl-2-cyclohexene-1,4-dione                      | -                  | 4.03±0.62            |
|                  | CH <sub>3</sub> C(O)OCH(CH <sub>3</sub> )C(O)CH <sub>3</sub> | 7.09±0.77          | 27.18±0.83           |
| <b>Pyrazines</b> | Pyrazine, ethyl-                                             | 5.05±0.53          | -                    |
|                  | Pyrazine, 2,3-dimethyl-                                      | 71.24±0.62         | 23.15±0.81           |
|                  | Pyrazine, 3-ethyl-2,5-dimethyl-                              | 3.09±0.30          | -                    |
|                  | <b>Pyrazine, tetramethyl-</b>                                | <b>722.33±5.17</b> | <b>1038.16±11.43</b> |
|                  | 2,3-Dimethyl-5-n-propylpyrazine                              | 3.07±0.27          | -                    |
|                  | 2,3-Dimethyl-5-isopentylpyrazine                             | 2.07±0.17          | -                    |
|                  | Pyrazine, 2,5-dimethyl-3-propyl-                             | -                  | 4.23±0.26            |
|                  | 2-Acetyl-3,4,6-trimethylpyrazine                             | -                  | 1.03±0.19            |
| <b>Others</b>    | Oxime-, methoxy-phenyl_                                      | 53.39±1.14         | 50.44±1.10           |
|                  | 1,3-Dioxolane, 2-ethyl-2,4,5-trimethyl-                      | -                  | 1.01±0.13            |
|                  | Phenol, 2-methyl-                                            | 20.17±0.59         | 23.21±1.41           |
|                  | Phenol, 4-ethyl-2-methoxy-                                   | 91.86±0.81         | 68.66±1.17           |
|                  | Phenol, 2,3,5,6-tetramethyl-                                 | 56.49±1.05         | -                    |
|                  | <b>1,3-Dioxepane, 2-pentadecyl-</b>                          | <b>30.31±0.49</b>  | <b>221.92±4.89</b>   |
|                  | Thymol                                                       | -                  | 37.42±1.71           |
|                  | <b>Creosol</b>                                               | <b>146.03±4.26</b> | <b>50.82±1.99</b>    |
|                  | Disulfide, dimethyl                                          | 12.05±0.74         | 6.08±0.76            |

Note: "-" not detected by HS-SPME-GC-MS. **Black fonts indicate VFCs with significant differences in aged HBV and SV.**
